## The CMU Array: A 3D Nano-Printed, Fully Customizable Ultra-High-Density Microelectrode Array Platform

### Authors:

M. Sadeq Saleh<sup>1</sup>, Sandra Ritchie<sup>1</sup>, Mark A. Nicholas<sup>2</sup>, Riddhiman Bezbaruah<sup>1</sup>, Rahul Panat<sup>1,†,‡,\*</sup>, Eric A. Yttri<sup>2,†,\*</sup>

### Affiliations:

<sup>1</sup>Department of Mechanical Engineering, Carnegie Mellon University, Pittsburgh, Pennsylvania, 15213, USA

<sup>2</sup>Department of Biological Sciences, Carnegie Mellon University, Pittsburgh, Pennsylvania, 15213, USA

† Carnegie Mellon Neuroscience Institute, Carnegie Mellon University, Pittsburgh, Pennsylvania, 15213, USA

‡ NextManufacturing Center, Carnegie Mellon University, Pittsburgh, Pennsylvania, 15213, USA

\* Correspondence and requests for materials should be addressed to R.P. ([rpanat@andrew.cmu.edu](mailto:rpanat@andrew.cmu.edu)) and E.A.Y. ([eyttri@andrew.cmu.edu](mailto:eyttri@andrew.cmu.edu))

The authors declare no competing financial interests.

**KEYWORDS:** Neural Probes, 3D Nanoparticle Printing, Microelectrode Array, Brain-Computer Interfaces, Neuroprosthetics, Multi-layer PCB Board, Aerosol Jet Printing

## Abstract

Microelectrode arrays (MEAs) provide the means to record electrophysiological activity fundamental to both basic and clinical neuroscience (e.g. brain-computer interfaces). Despite recent advances, current MEAs have significant limitations – including recording density, fragility, expense, and the inability to optimize the probe to individualized study or patient needs. Here we address the technological limitations through the utilization of the newest developments in 3D nanoparticle printing.<sup>1</sup> Our ‘CMU Arrays’ possess previously impossible electrode densities ( $> 6000$  channels/cm<sup>2</sup>) with tip diameters as small as 10 $\mu$ m. Most importantly, the probes are entirely customizable owing to the adaptive manufacturing process. Any combination of individual shank lengths, impedances, and layouts are possible. This is achieved in part via our new multi-layer, multi material, custom 3D-printed circuit boards, a fabrication advancement in itself. This device design enables new experimental avenues of targeted, large-scale recording of electrical signals from a variety of biological tissues.

## Introduction

Three-dimensional microelectrode arrays (MEAs) consisting of insulated, electrically conducting shanks are critical for a wide range of biological applications.<sup>2-3</sup> They form the cornerstone of neuroscience and serve as the basis for the transformational field of brain-computer interfaces. An MEA's success is dependent upon its sampling ability, a function of both the electrode density and ability to optimally target the brain regions of interest. While the current fabrication methods have achieved significant advances in recording density<sup>4-5</sup> due to the developments in the micro electro-mechanical systems (MEMS) fabrication techniques,<sup>6-10</sup> they are limited in their volumetric electrode densities, difficult to customize, and implement notoriously brittle silicon materials. Because the “Utah arrays” are fabricated from metallized silicon using techniques such as dicing, etching, and photo or electron beam lithography, the pitch (distance between adjacent shanks) for such an array construction is limited by the kerf width of the dicing saw, limiting the recording density to a few hundred shanks per square centimeter.<sup>6, 11</sup> Further, the shank height variation is limited to uniformly varying lengths. In another approach, multiple, high-density in-plane electrodes can be fabricated on a single silicon (Si) or Printed Circuit Board (PCB) shank.<sup>12</sup> By stacking multiple such shanks, a two or three-dimensional device can be built with 400-700  $\mu\text{m}$  pitch, but the distance between the stacked shanks is limited by assembly and bonding space requirements.<sup>13-14</sup> Recently, CMOS-enabled technology has silicon-based Neuropixel probes, but the targeted areas are limited to what can be reached by a single linear shank, and fewer than 400 of the possible channels along this shank can be used at any time.<sup>15</sup>

The next generation of tools for electrophysiological recording must overcome the limiting factors above. Additionally, advances in the rapidly expanding field of neuroscience would

greatly benefit from probes specific to the study or patient. We note that the fabrication methods for MEAs have followed the trends in the semiconductor industry – moving from microwires to lithography. Recently, 3D nanoparticle printing has emerged as a new method to fabricate electronic devices that either complements lithography or fills in the critical length-scale gaps left by current methods.<sup>16</sup> Microelectronics fabrication by inkjet<sup>17</sup> and aerosol jet<sup>18</sup> nanoparticle printing offers the freedom to use the target material in nano-dispersion form. This process enables rapid changes to the device layouts and the use of a variety of substrates to fabricate devices on, including flexible polymers. Flexible substrates can be used to create electrodes for uneven or moving surfaces, ideal for nerve-on-a-chip platforms or interfacing with cardiac tissue. The aerosol jet printing method can even print highly complex three-dimensional metallic lattices and spirals without any support materials.<sup>1</sup>

To this end, we developed a 3D nanoparticle printing system to open up an entirely new design space for three-dimensional bioelectronic devices. The objective was to exploit the rapid customization offered by 3D printing to demonstrate a new class of MEAs with high density and having arbitrary variation in shank heights, diameters, and routing. We demonstrate that the multi-scale, bottom-up printing method is able to assemble metal particles into three dimensional shanks with diameters of tens of micrometers and a length of several millimeters. Moreover, the printing method yields a significant cost and production time reduction. Further, we show that the high prototypability and reduction in the shank diameter leads to shank densities in excess of 6000 sites per  $\text{cm}^2$ ; an order of magnitude improvement over current methods.<sup>11</sup> With these arrays, physiologists can optimize the MEA to target neural architectures ranging from dense populations in the cerebellum to multiple, layer-specific cortical ensembles - or both, simultaneously.

## Microelectrode Array Construction via 3D Printing

The construction of the customizable, acute ‘CMU array’ microelectrode was carried out using aerosol jet conformal printing method, which is a 3D nanoparticle printing technique. In this method, a metal nanoparticle dispersion is atomized using ultrasonic energy or pressurized gas to create a mist or aerosol consisting of microdroplets. Each microdroplet carries metal nanoparticles from the dispersion. The aerosol is driven to a nozzle using an inert gas, while a sheath gas focuses the aerosol droplets onto the substrate at a resolution of about 10  $\mu\text{m}$ .<sup>1</sup> Once the printing is complete, the ‘green’ shanks are heated in an oven to remove the binders and allow the sintering of the nanoparticles to form the conductive shanks.

Figure 1 shows the 3D nanoparticle printing method and the construction of the shanks for the three-dimensional MEAs. As shown in figure 1a, the process of forming the array involves stacking of the metal nanoparticle-containing droplets on top of each other to form the high aspect ratio shanks. The substrate is heated to 90-110  $^{\circ}\text{C}$  during printing, which allows solvent evaporation and rapid solidification of the droplets once they approach the substrate. The solidified droplets then form a base for the subsequent droplets, leading to the formation of a shank. The process is repeated at each shank location (See Methods section for details of the 3D printing process and Supplementary Video 1 for a video of the printing process). The droplet dispense is controlled by a shutter that can break and re-start the flow within 4 ms. Figure 1b demonstrates a series of printed shanks on alumina substrate, each with a tip diameter of 10 $\mu\text{m}$ , a base diameter of 30 $\mu\text{m}$ , and a pitch of 125  $\mu\text{m}$  (density of 6400 shanks/ $\text{cm}^2$ ). The average aspect ratio along the length of the shanks in figure 1b is 50:1. Note that a 64-channel probe of 1mm long shanks takes under 90 minutes to construct by the 3D nanoparticle printing method.

Because of the ease of customization afforded by computer aided design, this method of

construction allows rapid changes to individual shank height and probe layout. Figure 1c shows silver shanks having different heights within the same probe made by 3D nanoparticle printing. This feature will allow the capture of electrical signals from different depths within the brain or other biological tissue. Since printing can be done on any substrate, a wide range of rigid and flexible substrates can be used for the construction of the probe. Arrays may be printed on a flexible Kapton<sup>®</sup> (polyimide) polymer substrate (Fig. 1d), enabling high-density, custom probes designed for use on curved or moving tissue. As a demonstration of the extent of flexibility in the design and fabrication of the shanks, we printed shanks bearing the CMU Array's name (Fig. 1e). The shanks in this array are 1 mm tall with shank diameter ranging from 90um at the bottom to 30um at the top. To increase packing density by 15% over the traditional square array, CMU array shanks can be arranged in a hexagonal pattern (Fig. 1f). Note that it is difficult if not impossible to create a hexagonal array pattern by other microelectrode fabrication technologies.

Figure 1g demonstrates a 512-shank array with variable shank heights of 1, 1.5, and 2 mm, which demonstrates the possible customization of the probe. See Supplementary Video 2 for a time-lapse video of the construction of this probe. The AJ printing process also enables exquisite control of shaping the tip profile (Fig. 1h). For all the shanks shown in figure 1, their angle to the vertical is within  $\pm 1^\circ$ . The results shown in figure 1 demonstrate that the 3D nanoparticle printing can be used to fabricate highly-customizable electrode arrays with high spatial densities. In the next section, we demonstrate probe structural properties, followed by custom electrical wiring, and functionalization and recording.

### **Characterization of Nano-enabled Probe Properties**

Electrode shanks must have the strength to penetrate the biological tissue of interest, such as the brain or cardiac muscle. In addition, shanks should ideally strike a balance with ductility to

tolerate outside forces, including initial resistance from dura matter or user error. In the case of silicon probes, while Si is exceedingly strong, the extreme brittleness of Si can make the probes prone to breakage. Previously, we have demonstrated highly ductile metal pillars of a few tens of micrometers in diameter under a compressive load without significantly losing strength.<sup>19</sup> We tested the high aspect ratio electrode shanks fabricated in this study (in an array of 3×3 shanks) and measured the load as a function of the displacement (Fig. 2a). We observed that for a displacement of the platen of up to 5%, the shanks show linear (elastic) deformation without breakage. The force required to bend the printed shanks shown was of the order of 2N/shank (Supplementary Fig. 1). Note that in studies of probe robustness, the force required to penetrate agarose brain phantoms for a large, 200μm diameter needle is of the order of 0.025N.<sup>20</sup> These shanks were further compressed without breakage but they enter a nonlinear (plastic) space, indicating permanent deformation.

Having achieved more than sufficient structural qualities, we next tested probe performance in tissue. We inserted a dense (6400 shanks/cm<sup>2</sup>), 10×10 array of 20μm diameter, uniform height shanks into the cortex of an anesthetized mouse. Higher spatial density of probes, even with densities half that shown here, can lead to a ‘bed of nails’ effect in soft tissue, where the tissue is depressed rather than penetrated during insertion.<sup>21</sup> In an attempt to overcome this undesirable effect, expensive accessory equipment must be used, including vibration drives or a pneumatic insertion hammers. Arrays with staggered shank lengths are also often used to reduce the number of shanks penetrating at any given time. Owing to the small cross-sectional area and narrow tips, the 10×10 array of uniform shank length was capable of penetrating into mouse brain with a basic, benchtop manual manipulator (Fig. 2b) at a rate of 0.2mm/min. Histological examination of penetrations made with quite longer shank (length >2mm, 15μm diameter at tip, 75μm at base,

25 shanks) also penetrate brain tissue without issue (Fig. 2c). Insertion test of this probe showed penetration through both mouse dura and brain, through area V2 to the hippocampus (Fig. 2c, right). Figure 2d shows the insertion of a probe into a macaque brain. Highly zoomed images of tissue immediately surrounding a shank in figure 2b can be found in Supplementary figure 2 which indicates no gross tissue damage, tearing, or apparent damage to the surrounding tissue as acute probe slid through the brain tissue.

The highly-customizable 3D printed CMU Array platform has sufficient strength and ductility to penetrate biological tissue such as brain. Further, the ability to print sharp shank tips (Fig. 1h) further facilitates the entry of the shanks without inflicting tissue damage. At present, we are able to repeatedly penetrate brain with arrays possessing an extremely high shank density of 6400 sites/cm<sup>2</sup> due to the method of construction and small cross-sectional area. With the structural components that will enable large-scale sampling of bioelectrical signals in place, we progress to recording single-unit neural activity.

### **Probe Functionalization and Recording of Action Potentials**

In order to functionalize the probe, shanks were coated with a conformal insulating layer followed by exposure of the metal through selective removal of the polymer from the tips (Fig. 3). The shanks were first coated with a 3 $\mu$ m insulating layer of biocompatible Parylene-C polymer in a vacuum chamber (Fig. 3b). The insulation was then removed selectively at the tip using a focused ion beam (FIB) cut with an exposed area in the range of 100-150  $\mu$ m<sup>2</sup> (Fig. 3c). The interface impedance of the shanks can be improved by coating the tips of the shanks with electrically conducting polymers such as poly(3,4-ethylenedioxythiophene), also known as PEDOT (Fig. 3d). The electrochemical impedance of the sites at the end of each shank was then measured. We observed impedances in the range of 200-400k $\Omega$  at a frequency of 1kHz (see



Supplementary Fig. 3). These impedance values are within the desired range<sup>13</sup> or even better than<sup>22</sup> that for the current microelectrode technologies.

Probes were inserted into the anesthetized mouse brain (see Methods for recording details). We were able to record signals and isolate action potential waveforms from individual cortical neurons in sensorimotor cortex (depth = 660  $\mu\text{m}$ ). Each panel in figure 3e illustrates a different channel from a single session. These represent the first ever *in vivo* neural recordings using a 3D printed electrode. Signals from channels were recorded simultaneously sorted offline using a threshold set at four standard deviations beyond the median filtered signal (See Methods). On any given channel, we were able to identify individual action potential waveforms from 0-2 putative neurons. Mean firing rates of isolated neurons were comparable to that typically observed (mean 9.2Hz, min/max 0.2-17.4 Hz with two putative multiunits at  $\sim$ 40Hz in the recording session shown). As an additional benchmark, we compared the quality of signal between the CMU array and a top of the line commercial silicon MEA (Cambridge NeuroTech). Recordings from mouse motor cortex were performed in separate animals using the same data acquisition system and sorting analysis. The 3D printed array had an excellent signal to noise ratio (mean 7.5, SEM 0.6), and similar neuron yield per site as that found with commercial probes.

Although we are able to fabricate probes with high shank density, a creative, customizable back-end connectivity solution is necessary for it to be successful. In the next sections we show that the metal nanoparticle printing can be combined with polymer printing using the same aerosol jet 3D printer to develop a multi-layer custom PCB board to wire the signals from high-density shanks. In addition, we also show that the probe can be printed on a pre-wired printed circuit board (PCB). These results have strong implications spanning several device technologies

in biomedical engineering.

### **Multi-layer, Multi-material Custom Routing of Signals**

As the high-density electrode leaves insufficient room for electrical leads, routing out the electric signals required an innovative solution. We again made use of the flexibility that 3D printing affords. We develop a multi-leveled, multi-material printing method to route the electrical signal to the appropriate recording devices (Fig. 4a). In the first step, a conductive metal layer (L1) of silver was printed on an alumina substrate as shown in figure 4b-i and the sintered in an oven. A layer of liquid polyimide polymer (L2) was then printed on the silver layer to form an insulating layer of 6 $\mu$ m thickness as shown in figure 4b-ii. The layer L2 was printed such that the ends of the lines in L1 were exposed for future connections. The polymer printing was achieved by aerosolizing the liquid polyimide in the aerosol jet printer and printing the aerosol droplets onto the silver lines of L1. The polyimide was heated to facilitate polymerization, which formed the insulating layer L2. This process can be repeated as many times as is necessary (Fig. 4b-iii, 4b-iv). An additional polymer layer printed on the topmost metal layer (Fig. 4b-v) completed the multi-layer PCB board to route the electric signals. The example in figure 4c shows routing from a 100-channel probe from a 2mm  $\times$  2mm area. The density and multi-level layout of the electrical connections from the shanks to the pads for the CMU Array in figure 4c are highlighted in a backscatter electron image in Supplementary figure 4.

In order to further exploit the flexibility offered by the nanoparticle printing process, we have also explored the printing of the shanks on the metal pads of a PCB board, which enables additional flexibility in the construction of the bioelectrodes (Figure 4d). The board had

electroless nickel immersion gold (ENIG) metallization, a standard in the microelectronic industry. The micro-positioning accuracy for printing was within +/-1 um. In order to enable probes on a flexible substrate shown in figure 1d, we also demonstrate the printing of wiring connections on a flexible polymer substrate (Kapton<sup>®</sup> film, figure 4e). The results in Figs. 4 establish that the aerosol jet printing offers enormous flexibility in routing the signals from the CMU Array demonstrated in this work.

## Discussion

The CMU Array demonstrated here overcomes current limitations in large-scale recording from a variety of biological tissue and opens up several new horizons for nanofabrication of biomedical solutions. First, the ability to print and wire shanks at arbitrary locations allows the CMU array to target specific regions of interest across distant areas of the brain – thus enabling precision science and reducing damage due to unwanted shanks inherent in one-size-fits-all probes. Indeed, increased study of the cascade of areas within the three-dimensional distribution of circuits in the brain appears to be the future of neuroscience.<sup>15, 23-25</sup> The extremely high shank density we achieved (exceeding 6000 sites/cm<sup>2</sup>) represents an order of magnitude improvement over current microelectrode techniques. Second, as shown in figures 1 and 4, the metal-polymer printing developed in this paper allows rapid prototyping and custom routing of signals from shanks via changes to the printing programs. This combination of creating 3D objects (shanks) along with layered 2D planar wires (routing) will enable a rapid on-demand fabrication of study-specific probes or patient-specific neural interfaces. The use of flexible substrates provides an additional degree of customization not offered by the current methods. While extensive focus has been placed on increasing electrode channel counts, these channels are only helpful if they are able to be placed in the correct locations. The CMU array constitutes a new avenue of targeted,

optimized research that promises to reveal information processing strategies employed by neural ensembles across brain areas.<sup>5</sup>

The novel fabrication techniques also yield logistical improvements. Probe production time constitutes a matter of hours (followed by standard fab processes run in batch form the following day); rather than weeks. We note that aerosol jet printers with four nozzles that can print shanks simultaneously are commercially available and would further reduce the fabrication time. Lastly, we expect a significant reduction in the cost of the probes using this method, which will reduce the barriers to entry for researchers and clinicians that are either running hypothesis-driven experiments or aiming to create devices. Such ‘democratization’ of the microelectrode technology will immensely benefit researchers and clinicians.

We note that the proposed fabrication technique depends only upon aerosol droplet dynamics (Figure 1a) and not on the nanoparticles inside the droplets. It is thus possible to construct the CMU Array from different materials, although the emphasis in this work largely has been on using silver due to the availability of the nanoparticle dispersions suitable for printing. The shanks can readily be plated with PEDOT (Figure 4) and gold (Supplementary figure 5). We also note that although aerosol jet printing is used in the current work, other droplet based printing methods such as fine inkjet printing<sup>26</sup> can be potentially explored construct the three dimensional shanks. Such an effort will be part of a future investigation.

The flexibility of production may provide further inroads across biomedical and material science. The printing of three-dimensional features provides a means to fabricate hollow metallic tubes. Such a construct can be used as microneedles for drug delivery and/or extraction of fluids; all while recording the bioelectric signals. The current method can also be combined with

printing of three dimensional transparent polymers<sup>18</sup> to construct optic-fiber paired probes for optogenetic stimulation and recording of neural signals. Lastly, the microelectrodes can be used in non-biological applications such as changing surface hydrophobicity through texturing, increasing energy storage in batteries through an increase in the surface area, and specific sensor devices.

In summary, we have demonstrated a rapid 3D additive printing method we developed to create a new class of customizable, high-density microelectrode array and demonstrated its superior operation in penetrating and recording from biological tissue. The technology increases recording sites per unit area by an order of magnitude and enables the on-demand, study-specific prototyping and manufacture of electrode configurations in a few hours. This technology paves the way to large-scale probes (thousands of channels; over several cm<sup>2</sup> area) with easily modified probe layouts that can capture and potentially manipulate the dynamics of large, multi-area neural circuits with single-neuron and single-millisecond resolution.

## References:

1. Saleh, M. S.; Hu, C.; Panat, R., Three-Dimensional Microarchitected Materials and Devices Using Nanoparticle Assembly by Pointwise Spatial Printing. *Science Advances* **2017**, *3*, e1601986.
2. Spira, M. E.; Hai, A., Multi-Electrode Array Technologies for Neuroscience and Cardiology. *Nature Nanotechnology* **2013**, *8*, 83.
3. Viventi, J.; Kim, D.-H.; Vigeland, L.; Frechette, E. S.; Blanco, J. A.; Kim, Y.-S.; Avrin, A. E.; Tiruvadi, V. R.; Hwang, S.-W.; Vanleer, A. C., Flexible, Foldable, Actively Multiplexed, High-Density Electrode Array for Mapping Brain Activity in Vivo. *Nature Neuroscience* **2011**, *14*, 1599.
4. Berényi, A.; Somogyvári, Z.; Nagy, A. J.; Roux, L.; Long, J. D.; Fujisawa, S.; Stark, E.; Leonardo, A.; Harris, T. D.; Buzsáki, G., Large-Scale, High-Density (up to 512 Channels) Recording of Local Circuits in Behaving Animals. *Journal of Neurophysiology* **2014**, *111*, 1132-1149.
5. Zandvakili, A.; Kohn, A., Coordinated Neuronal Activity Enhances Corticocortical Communication. *Neuron* **2015**, *87*, 827-839.
6. Campbell, P. K.; Jones, K. E.; Huber, R. J.; Horch, K. W.; Normann, R. A., A Silicon-Based, Three-Dimensional Neural Interface: Manufacturing Processes for an Intracortical Electrode Array. *IEEE Transactions on Biomedical Engineering* **1991**, *38*, 758-768.
7. Jones, K. E.; Campbell, P. K.; Normann, R. A., A Glass/Silicon Composite Intracortical Electrode Array. *Annals of Biomedical Engineering* **1992**, *20*, 423-437.
8. Bhandari, R.; Negi, S.; Solzbacher, F., Wafer-Scale Fabrication of Penetrating Neural Microelectrode Arrays. *Biomed Microdevices* **2010**, *12*, 797-807.
9. Goncalves, S. B.; Peixoto, A. C.; Silva, A. F.; Correia, J. H., Fabrication and Mechanical Characterization of

- Long and Different Penetrating Length Neural Microelectrode Arrays. *Journal of Micromechanics and Microengineering* **2015**, *25*, 055014.
10. Normann, R. A.; Fernandez, E., Clinical Applications of Penetrating Neural Interfaces and Utah Electrode Array Technologies. *Journal of Neural Engineering* **2016**, *13*, 061003.
  11. Maynard, E. M.; Nordhausen, C. T.; Normann, R. A., The Utah Intracortical Electrode Array: A Recording Structure for Potential Brain-Computer Interfaces. *Electroencephalography and Clinical Neurophysiology* **1997**, *102*, 228-239.
  12. Van Zant, P.; Van Zant, P., *Microchip Fabrication*; McGraw-Hill Professional, 2004; Vol. 31.
  13. Herwik, S., et al., Fabrication Technology for Silicon-Based Microprobe Arrays Used in Acute and Sub-Chronic Neural Recording. *Journal of Micromechanics and Microengineering* **2009**, *19*, 074008.
  14. Barz, F.; Livi, A.; Lanzilotto, M.; Maranesi, M.; Bonini, L.; Paul, O.; Ruther, P., Versatile, Modular 3d Microelectrode Arrays for Neuronal Ensemble Recordings: From Design to Fabrication, Assembly, and Functional Validation in Non-Human Primates. *Journal of Neural Engineering* **2017**, *14*, 036010.
  15. Jun, J. J.; Steinmetz, N. A.; Siegle, J. H.; Denman, D. J.; Bauza, M.; Barbarits, B.; Lee, A. K.; Anastassiou, C. A.; Andrei, A.; Aydın, Ç., Fully Integrated Silicon Probes for High-Density Recording of Neural Activity. *Nature* **2017**, *551*, 232.
  16. Rahman, M. T.; McCloy, J.; Ramana, C. V.; Panat, R., Structure, Electrical Characteristics, and High-Temperature Stability of Aerosol Jet Printed Silver Nanoparticle Films. *Journal of Applied Physics* **2016**, *120*, 075305.
  17. Singh, M.; Haverinen, H. M.; Dhagat, P.; Jabbour, G. E., Inkjet Printing—Process and Its Applications. *Advanced Materials* **2010**, *22*, 673-685.
  18. Rahman, T.; Renaud, L.; Heo, D.; Renn, M. J.; Panat, R., Aerosol Based Direct-Write Micro-Additive Fabrication Method for Sub-Mm 3d Metal-Dielectric Structures. *Journal of Micromechanics and Microengineering* **2015**, *25*, 107002.
  19. Saleh, M. S.; HamidVishkasougheh, M.; Zbib, H.; Panat, R., Polycrystalline Micropillars by a Novel 3-D Printing Method and Their Behavior under Compressive Loads. *Scripta Materialia* **2018**, *149*, 144-149.
  20. Apollo, N. V.; Jiang, J.; Cheung, W.; Baquier, S.; Lai, A.; Mirebedini, A.; Foroughi, J.; Wallace, G. G.; Shivdasani, M. N.; Praver, S., Development and Characterization of a Sucrose Microneedle Neural Electrode Delivery System. *Advanced Biosystems* **2018**, *2*, 1700187.
  21. Okamura, A. M.; Simone, C.; O'leary, M. D., Force Modeling for Needle Insertion into Soft Tissue. *IEEE Transactions on Biomedical Engineering* **2004**, *51*, 1707-1716.
  22. Wise, K. D.; Anderson, D. J.; Hetke, J. F.; Kipke, D. R.; Najafi, K., Wireless Implantable Microsystems: High-Density Electronic Interfaces to the Nervous System. *Proceedings of the IEEE* **2004**, *92*, 76-97.
  23. Shimaoka, D.; Steinmetz, N. A.; Harris, K. D.; Carandini, M., The Impact of Bilateral Ongoing Activity on Evoked Responses in Mouse Cortex. *ELife* **2019**, *8*, e43533.
  24. Yttri, E. A.; Dudman, J. T., Opponent and Bidirectional Control of Movement Velocity in the Basal Ganglia. *Nature* **2016**, *533*, 402.
  25. Zhao, Y.; You, S. S.; Zhang, A.; Lee, J.-H.; Huang, J.; Lieber, C. M., Scalable Ultrasmall Three-Dimensional Nanowire Transistor Probes for Intracellular Recording. *Nature Nanotechnology* **2019**, *1*.
  26. Calvert, P., Inkjet Printing for Materials and Devices. *Chemistry of Materials* **2001**, *13*, 3299-3305.

**Acknowledgements:** R.P. and E.A.Y. acknowledge support from the NIH (1R21EY029441) and the DSF Foundation. We thank the Andreas Pfenning group for providing the opportunity to test the probe in the macaque brain, and Jay Reddy and Maysam Chamanzar for PEDOT technical assistance. Many thanks to Drs. Nick Melosh, Nick Anderson, Bin He, and Jack Beuth for helpful discussions as we prepared the study.

**Author contributions:** M.S.S., E.A.Y., and R.P. conceived and designed the experiments. M.S.S., S.R., M.A.N., AND R.B. performed the experiments. All authors analyzed the data and discussed the results. M.S.S., E.A.Y., and R.P. co-wrote the paper.

## Methods:

**3D Nanoparticle Printing:** To construct the nanoprinted array (CMU array), we used Ag nanoparticle ink, i.e., Ag nanoparticles dispersed in a solvent (Prelect TPS 50 G2, Clariant Group, Frankfurt, Germany). Ag was chosen due to the commercial availability of the inks (i.e. dispersions) for this printing method.<sup>1, 16</sup> The Ag nanoparticle size in the ink was 30-50 nm, the ink viscosity was about 1.5 cP, and the Ag particle loading in the ink was about  $40 \pm 2$  wt %. The solvents used for this ink were de-ionized (DI) water and ethylene glycol. Ethylene glycol acts as a humectant and dispersant to help in the formation of the shank/pillar structures required for this work. Different substrates were used for this work. One of the substrates was alumina slab with 96% purity (ALN-101005S1, MTI Corp, Richmond, CA). The second substrate was silicon wafer. For alumina and Si substrates, the printing of silver nanoparticles and Kapton polymer were used to construct the leads to route the signal from the shanks. The third substrate was a PCB board with pads with dimensions of  $340 \times 340$   $\mu\text{m}$  and a metallization of electroless nickel immersion gold (ENIG). The microelectrodes were insulated using 5-10 microns of Parylene-C (SCS Labcoter-2, dimer mass 8.3 g, furnace setpoint 690 °C, chamber gauge setpoint 135 °C, vaporizer setpoint 175 °C, vacuum setpoint 35 mTorr). Parylene was chosen as the insulator material due to its superior biocompatibility, high resistivity, impermeability to biological species, and conformal deposition process. Deposited thin-film thickness was verified by including a calibration Si wafer alongside the 3D printed electrode array in the deposition chamber and measured using reflectometry (Nanometrics Nanospec 210XP). The metal at the tips of the shanks was exposed by removing Parylene-C using a focused ion beam (FIB) machine (Model SMI3050SE, Seiko Instruments, Chiba Japan) that used a beam of  $\text{Ga}^+$  ions.

An Aerosol Jet 3D printer (Model AJ-300, Optomec, Inc., Albuquerque, NM) was used to print the microelectrode arrays. The AJ system at Carnegie Mellon University consists of three atomizers (two ultrasonic atomizers and a pneumatic atomizer), a programmable XY motion stage, a UV light source, and a deposition head. For the construction of the microelectrode arrays, we used one ultrasonic atomizer to aerosolize the silver ink. The aerosolized ink droplets were carried to a nozzle by a carrier gas ( $\text{N}_2$ ). Inside the nozzle, the droplets were focused toward the nozzle with the help of a sheath gas (also  $\text{N}_2$ ) to form a micro-jet. In case of printing of polymers we used pneumatic atomizer. The printing process was carried out by a continuous flow of droplets which was diverted or resumed by movement of a shutter. The diameter of the nozzle was 150  $\mu\text{m}$ , which is known to give rise to an aerosol stream having diameter of  $\sim 10$   $\mu\text{m}$ .<sup>16</sup> Before printing, the geometry of the conductive part was drawn in AutoCAD using a program in the software AutoLISP (AutoCAD 2015, Autodesk Inc., San Rafael, CA) and converted to a “prg” file compatible with the printer software. The platen on which the substrates were placed was heated to 110 °C. The shanks were printed by droplet-over-droplet in a method developed by the PIs, where semicircular printing was done to create a layer of about 20  $\mu\text{m}$  thickness within a fraction of a second. The gas flow rate in the AJ machine during printing was about 25 sccm, while that for the sheath gas was about 50 sccm. Note that although the microelectrodes shown in figure 1 are made of sintered silver nanoparticles, it is possible to use other metals as the 3D nanoparticle printing process is based on microdroplet dispense rather than the type of metal used.



**Sintering Conditions:** The microelectrode array printed on alumina substrates were sintered at 250 °C for 6 hours at a ramp rate of 1 °C/min (for shanks <1.5mm long) and 0.3 °C/min (for shanks >1.5 mm long). For shanks on alumina, an alternate sintering temperature of 450 °C for 2 hours gave the same results. The microelectrode arrays printed on the Kapton substrate were sintered at 335 °C for 2 hours (same ramp rate as that for samples on alumina substrate). The microelectrode array printed on the PCB substrate were sintered at 195 °C for 2 hours (ramp rate of 1 °C/min). The sintering temperatures and times were chosen from PIs' previous work on the sintering of silver nanoparticles.<sup>16, 19</sup> The sintering was carried out in a programmable oven with controlled heating rates (Neytech Vulcan furnace, Model 3-550, Degussa-Ney Dental Inc., Bloomfield, CT). The printed Kapton for the multi-layer routing pattern was sintered at 330 °C.

**PEDOT Electroplating:** PEDOT electroplating was carried out using a recipe developed at CMU. The electroplating solution was prepared by combining and mixing thoroughly 2 ml DI water and 41.24 mg polysodium styrene sulfonate (PSS) in a test tube. 2.2 µl of 3,4-ethylenedioxythiophene (EDOT) was added using a micropipette. This mixture was mixed thoroughly via shaking. The solution was sealed and refrigerated for 24 hours before use. Prior to electroplating, the solution was brought to room temperature and mixed again before electrodeposition. A Keithley 2401 sourcemeter as a current controlled power supply was used for the electrodeposition. All chemicals were purchased from Sigma Aldrich.

**Gold Electroplating:** Gold electroplating was carried out using in Earthcoat Cyanide Free Gold Plating Solution (24K) heated to 60 °C on a hot plate with stirrer (Model MS300HS, Medline Scientific, Oxon, United Kingdom). The solution (filled to an adequate depth for submersion in a 1 L thick glass beaker) was agitated to mix well prior to probe immersion, but no agitation was used during plating to prevent damage to the device. The probe was cleaned before plating by submerging it in DI water (3 separate beakers used in sequence to reduce contamination). The probe was plated using Spa Plating (Bath, United Kingdom) MF Rectifier at a current of 0.1 A for 5 minutes, using a stainless-steel electrode. After plating, the rinsing process was repeated (using 3 beakers with fresh DI water) to remove any remaining plating solution. Energy dispersive X-ray spectroscopy (EDS) analysis was done to verify that the solution was plating gold without contamination.

**Compression Test for the Shanks:** Isolated shanks were printed onto an alumina substrate and tested under compression. The tests were carried out in a universal testing machine (Instron Corp, Newton MA) at a compression rate of 2mm/ min and quipped with a 20N load cell. A camera (Canon EOS Ti7 Rebel, Canon Corp, Tokyo, Japan) with a magnifying lens (model Tube TS-160, Infiniti Photo-Optical Company, Boulder CO) was used to record the compression behavior.

**Electrode insertion tests:** Insertion testing was performed on the brains of adult C57/B6 mice. Anesthesia was administered via 2-3% inhaled isoflurane and was continued throughout the implantation. Craniotomies were performed to access the brain and the dura resected. Probes were dipped in Evans blue dye and then were then lowered through the craniotomy using a manual stereotax manipulator (RWD) at a rate of 100-200µm/min. The probe was left in place for 5 minutes before being removed. Following several minutes following the removal of the probe, the mouse was euthanized with an overdose of isoflurane and decapitation. All procedures

were approved by the Carnegie Mellon University Institutional Animal Care and Use Committee. Macaque insertion was performed in a similar manner on an adult animal recently euthanized for experimental purposes.

***Electrophysiology:*** In a different set of experiments, neural signals from were recorded from mouse sensorimotor cortex. The acute (i.e. not chronically implanted) recordings were performed in anesthetized mice (1.25-2% isoflurane) and lasted approximately 30 minutes. During recordings, the whiskers were manually manipulated to encourage activity. A reference wire shorted to ground resting on the acrylic head cap was also isotonicly connected to the brain tissue. Recorded voltages containing neural signals were routed out through the custom routing board described to an Intan-based amplifier and data acquisition system (Whisper System, Neural Circuits LLC) running SpikeGLX ([github.com/billkarsh/SpikeGLX](https://github.com/billkarsh/SpikeGLX)). Spikes from each channel were sorted offline using a custom-built spike sorter that applied a high-pass filter to sort out spike frequency bands (300-5000Hz). The amplitude discrimination threshold was set at four standard deviations above and below the mean of the recording segments. For each peak exceeding the threshold in magnitude, a three-millisecond putative waveform aligned on the absolute minimum of the waveform was then stored. The signal-to-noise ratio for the waveforms over a session was calculated as the peak-to-peak amplitude of the average waveform divided by the calculated voltage RMS. Values of greater than 1.5 were considered to be quality units that were easily discriminable from the underlying noise floor.

***Histology:*** For reconstruction of probe placement, the array was dipped in Evan's Blue before implantation. Electrode tracks were imaged in the 40um slices, typically orthogonal to the axis of entry. Brain slices were placed on slides for imaging electrode tracks using a mounting medium that included a DAPI stain, which labels the nuclei of individual cells.

**Figure 1. Microelectrode array Fabrication using 3D nanoparticle printing.** (a) Schematic of the printing process, where aerosol droplets containing metal nanoparticles are stacked while instantaneously removing the solvent using the heat from the substrate. The long, narrow shanks are then sintered to remove the binders and create conductive paths to capture bioelectric signals. (b) Example microelectrode array with 1.125mm long shanks having an aspect ratio of 1:50 at a 125um grid. The substrate is alumina ceramic. (c) Printed shanks of different lengths and diameters (length=100-650 um, diameters = 35-50 um). Any combination of lengths and diameters is possible in the finalized probe. (d) Example of microelectrodes directly printed on a flexible polyimide (Kapton<sup>®</sup>) substrate. Wiring is also printed on the same substrate to connect the shanks to an external circuit. (e) Printed microelectrodes in an arbitrary pattern to resemble the Carnegie Mellon University abbreviation ‘CMU’, showing the extent of flexibility in design and fabrication by the 3D printing method in (a). A close-up of the shanks is shown on the right. (f) High density-high aspect ratio array printed in hexagonally packed pattern with 200um pitch distance. A 15% improvement in areal electrode density can be achieved by patterning the electrodes in hexagonal pattern rather than square packing. (g) A 512-electrode shank array with variable shank heights demonstrating the customization possible by this method. A time-lapse video of the construction of the probe is shown in Supplementary Video 2. (h) Examples demonstrating the control of the shank tips to facilitate their insertion and tolerance in biological tissue.

**Figure 2. Mechanical properties of the probes and their insertion into mouse brain.** (a) A 3×3 shank array under various forces of compression under a rigid platen. For a displacement of the rigid platen of up to 5%, the shanks show linear (elastic) deformation without breakage. The force-strain curve of this experiment is shown in Supplementary figure 1 and gives a maximum bending force of 2N/shank. The shanks can be further compressed without breakage but they are in a nonlinear (plastic) space, indicating permanent deformation. (b) Evans blue dye left behind from the successful insertion of a dense (6400 shanks/cm<sup>2</sup>), 10×10 array of 20um diameter array with zoomed image (right). (c) Successful insertion test through dura in an anesthetized mouse without breaking the shanks nor gross damage to the brain (coronal slice through area V2, hippocampus; purple = DAPI nuclear stain, red = Evan’s blue). (d) Horizontal brain slice from insertion test into monkey cortex. Note the lack of damage or tearing caused by probe insertion in c,d. Highly zoomed images of tissue immediately surrounding shank penetration sites in (b) can be found in supplementary figure 2.

**Figure 3. CMU array functionalization and recording of action potentials from mouse brain.** (a, b) A schematic and a SEM image of 3D printed probe with parylene insulation. (c) Exposure of the tip using focused ion beam, thus enabling the probe to record neural voltages. (d) Selective deposition of PEDOT at the tip using electroplating for reduced impedance. (e) Traces from 32 example channels of neural activity from one *in vivo* neural recording session in sensorimotor cortex of an anesthetized mouse. On some channels, waveforms from multiple neurons are identifiable. All data above a threshold of 1.5 SD are shown. Scale bar (top left) = 1ms x 50uV.

**Figure 4. Electrical routing of the high-density shanks.** (a, b) Multi-layer metal-polymer printing to fabricate a custom board to route signals from high density microelectrode array. (a) Exploded view of the different layers of the multi-layer probe. (b) Step-by-step process of printing the multi-layer board. (i) Printing of first metal layer on alumina ceramic with pads at both ends of each line. (ii) Polyimide printing to insulate the metal lines except at the pads. (iii) Middle polyimide layer to isolate the layer-4 from layer-1. (iv) Printing of the upper metal layer to create two conductive layers routing the signal out. (v) Polymer insulation printed on the upper metal layer except at the pads on the two ends. (vi) Printing of the shanks at precise locations of the exposed inner pads. (vii) Sintering of the entire structure at 210 °C for 2 hours. Note that the signal routing can be customized by simple changes to the printing program allowing arbitrary locations and heights for the probes and pads. Images show a 100-shank probe over an area of 2mm × 2mm. (b) 3D printed three dimensional microelectrodes on a PCB board which is pre-wired using lithography methods. (e) Aerosol jet printed wiring on polyimide (Kapton) substrate.

**Figure 1**

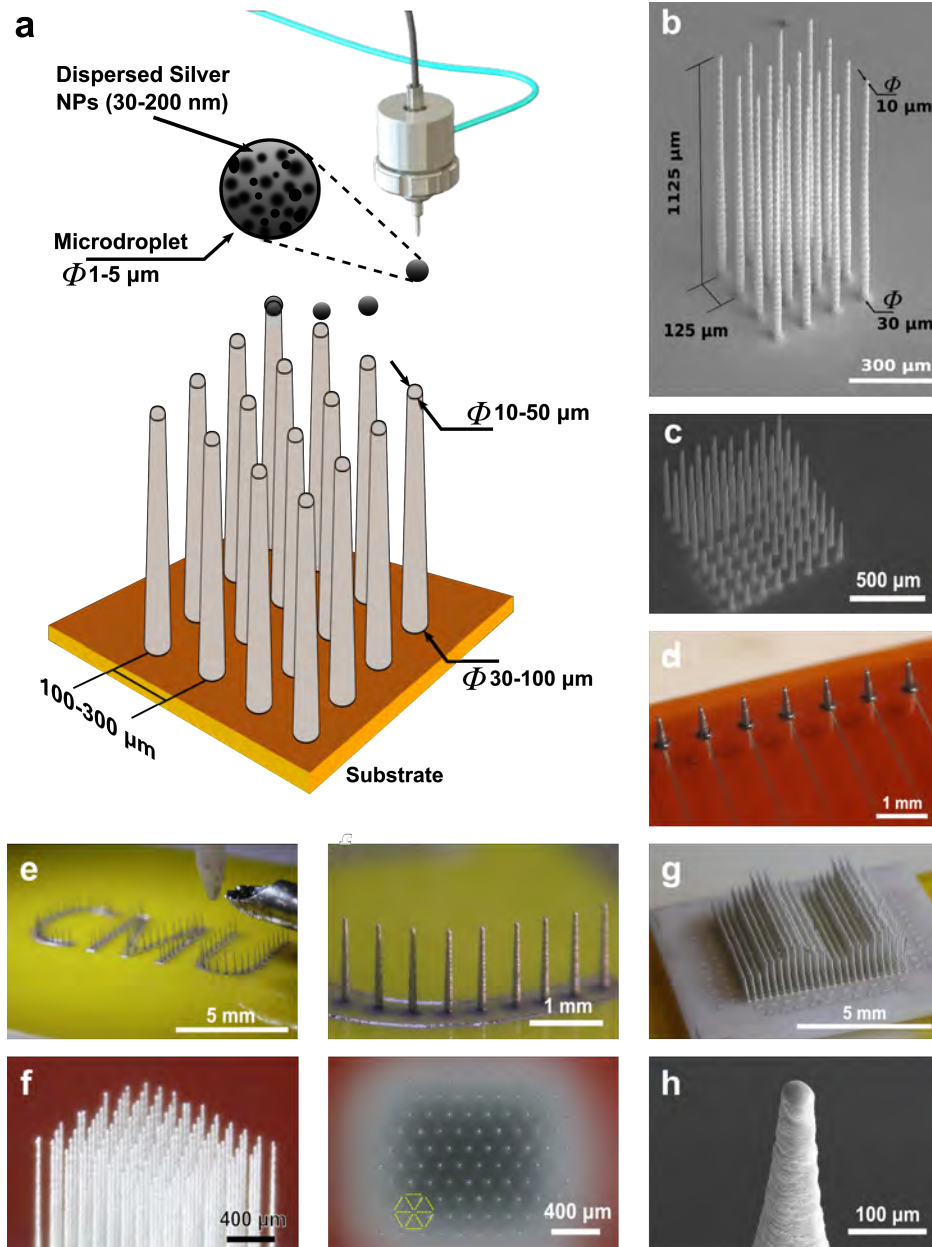

**Figure 2**

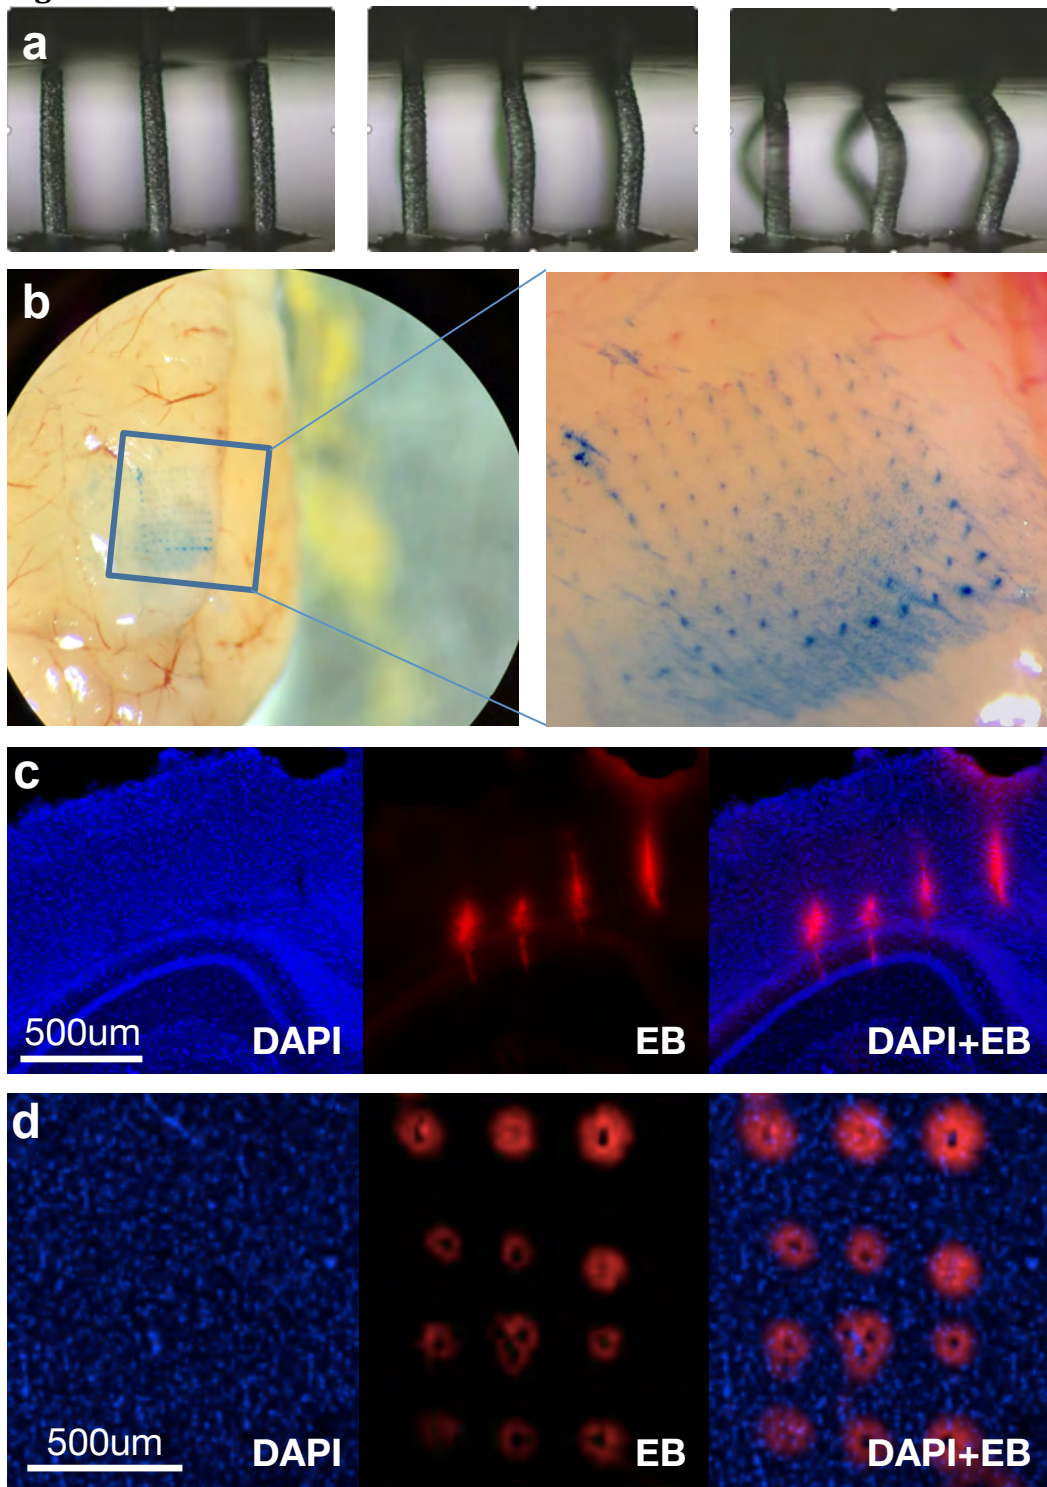

**Figure 3**

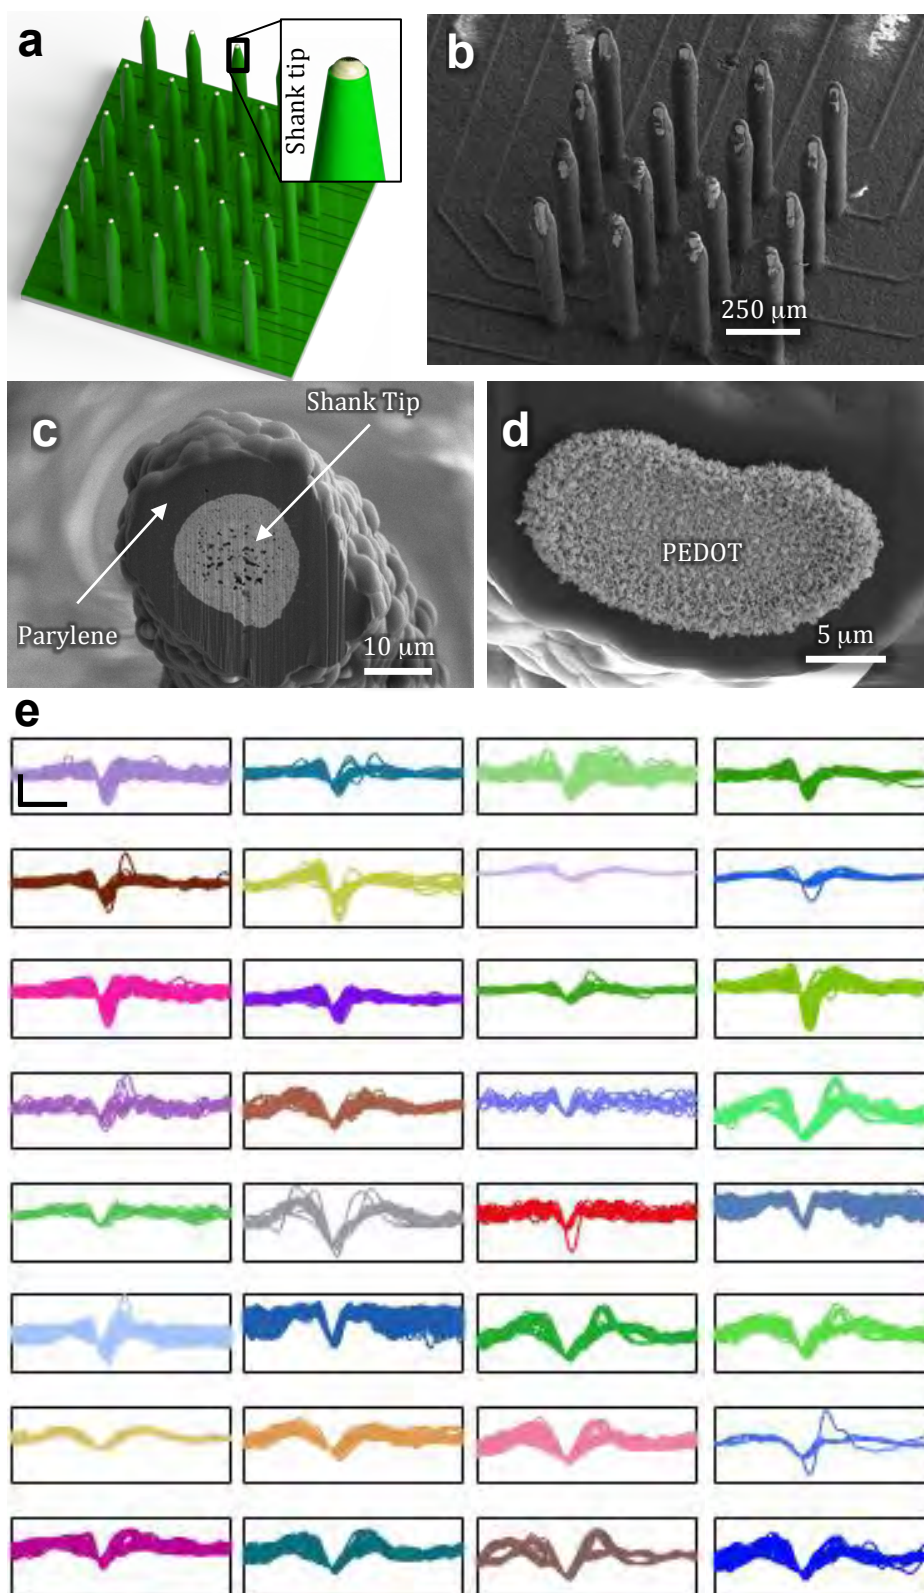

**Figure 4**

**a** Exploded view of the multi-layer routing for the microelectrode array probe

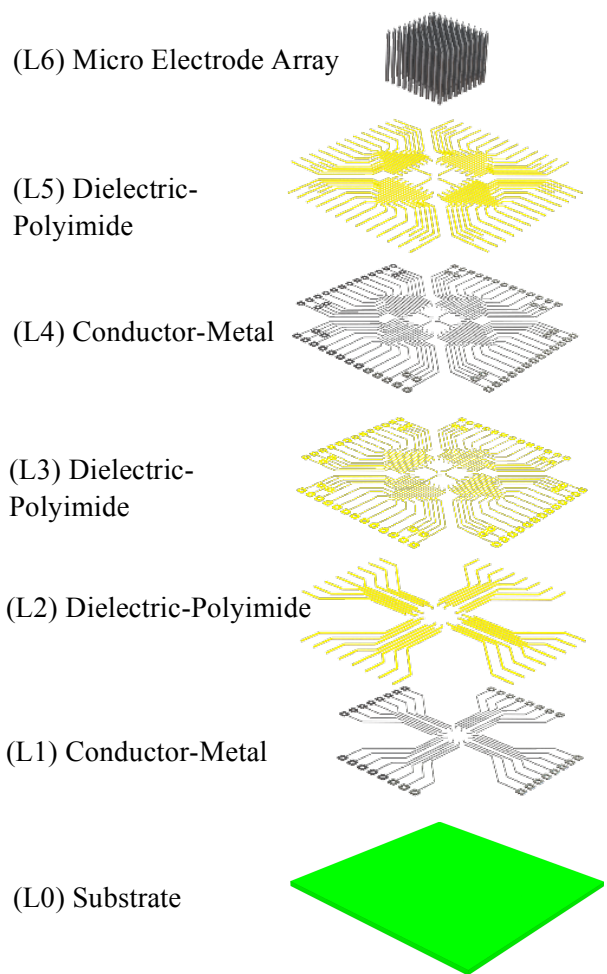

**b** Step-by-step aerosol jet printing process to construct a multi-layer high-density probe with custom routing

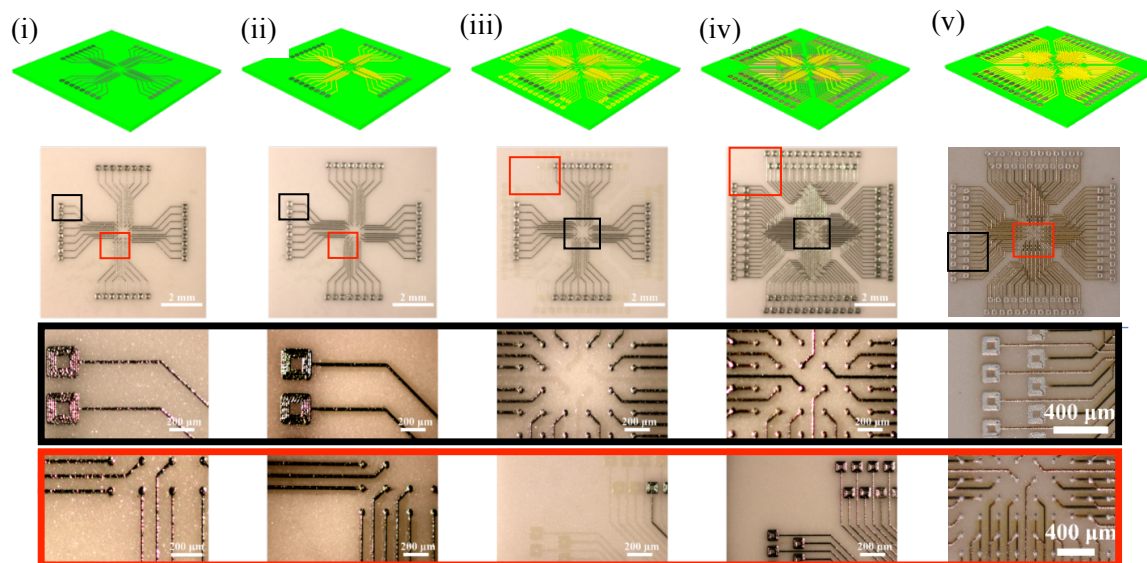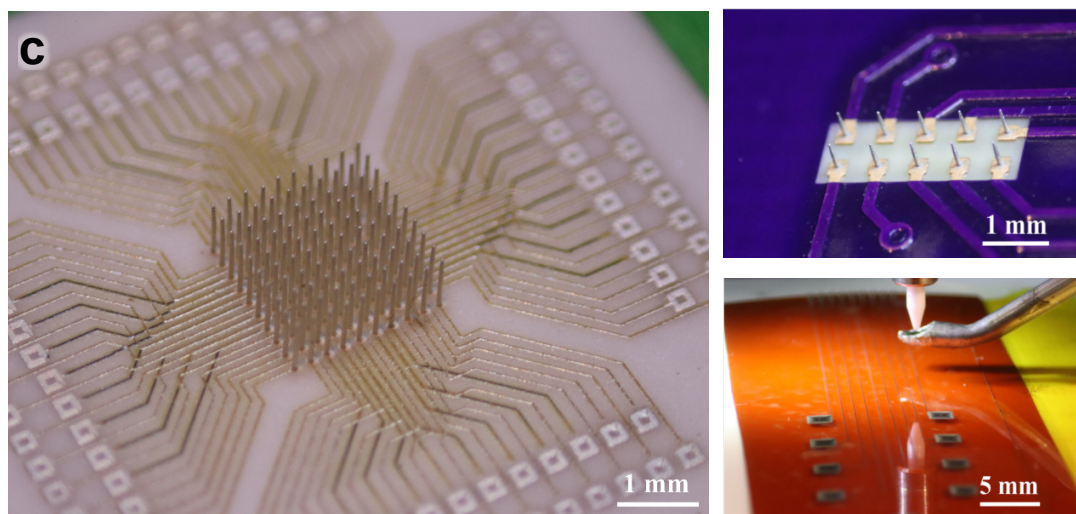



## Supplementary Information

**Supplementary Video 1:** A video showing a 4x4 CMU Array being built by aerosol jet printing. In this case, the electrodes are spaced 400um from each other and have a base diameter of 90um. The diameter can be reduced gradually to 10-15 um to create a taper via the AutoCAD program. The signal collection circuitry printed on the substrate allows perfect integration of the device in a single process. The captured video (at 45 deg angle) is slowed down by 10x for the purpose of clarity.

**Supplementary Video 2:** A time-lapse video of the construction of this probe.

**Supplementary figure 1:** Load-displacement plot for the 3x3 array shanks shown in figure 2a. The plastic deformation starts at about 7% of the strain. The shanks do not break until about 60% strain as shown in figure 2a.

**Supplementary figure 2:** (a) A zoomed image of histological slice (DAPI, pseudocolored green) from the CMU Array penetration shown in figure 2b into a mouse brain demonstrating lack of gross tissue damage surrounding penetration holes (arrows). Diamond pattern of penetrations is the result of brain slices being slightly non-orthogonal to insertion angle. (b) A close-up of the insertion in (a) confirming no gross damage to the brain tissue outside of the penetration path of the shanks.

**Supplementary figure 3:** Electrical characterization of a CMU Array shanks showing an impedance in the range of 100s of k $\Omega$  at 1kHz frequency. (a) An impedance of 662 k $\Omega$  at 1 kHz frequency without PEDOT coating. (b, c) Impedances of 379k $\Omega$  and 256 k $\Omega$  at 1 Hz frequency for two different shanks with PEDOT coating.

**Supplementary figure 4:** A SEM image (with backscatter electron mode) of the CMU Array shown in figure 4c. The routing complexity achieved by printing is evident.

**Supplementary figure 5:** A Focused Ion Beam (FIB) section showing electroplated gold layer on 3D printed Ag shanks of the CMU Array (inset shows the orientation of the image). A standard cyanide-free gold plating recipe was used for the electroplating process (see Methods section of the paper).

### Supplementary figure 1

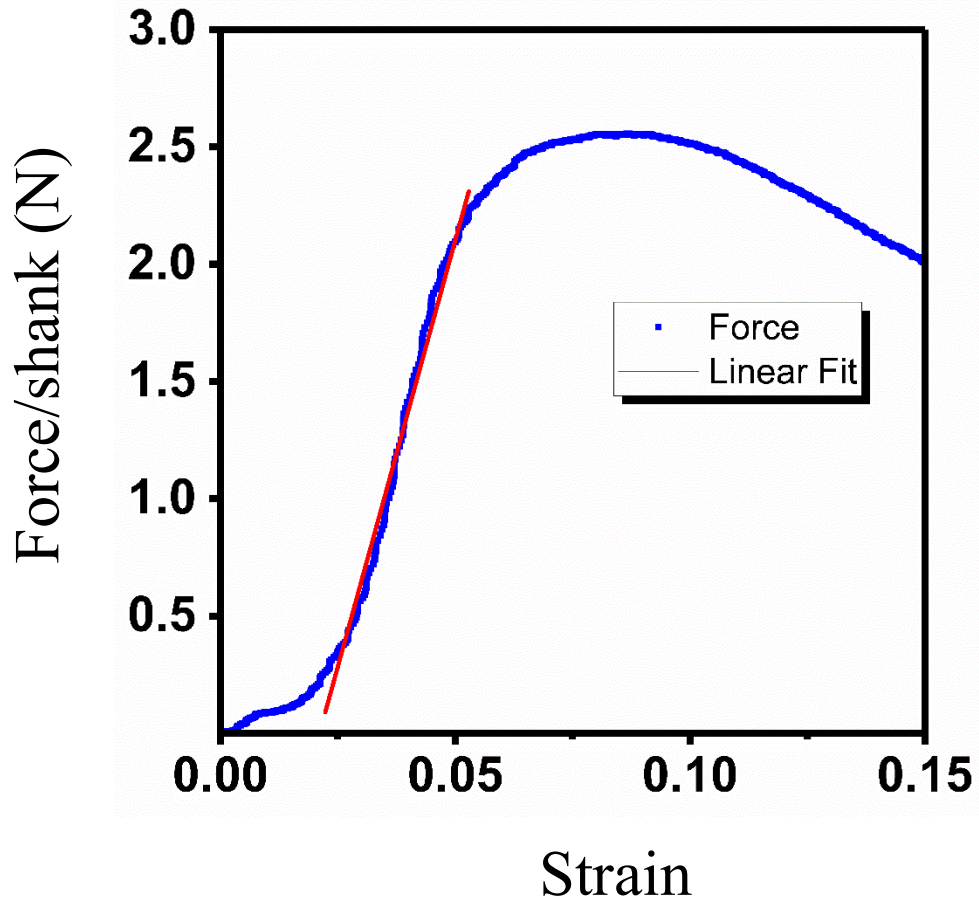

## Supplementary figure 2

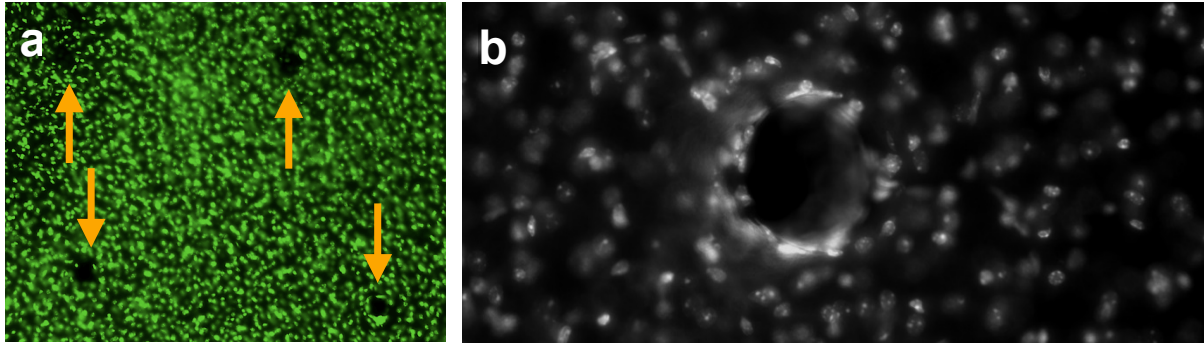

### Supplementary figure 3

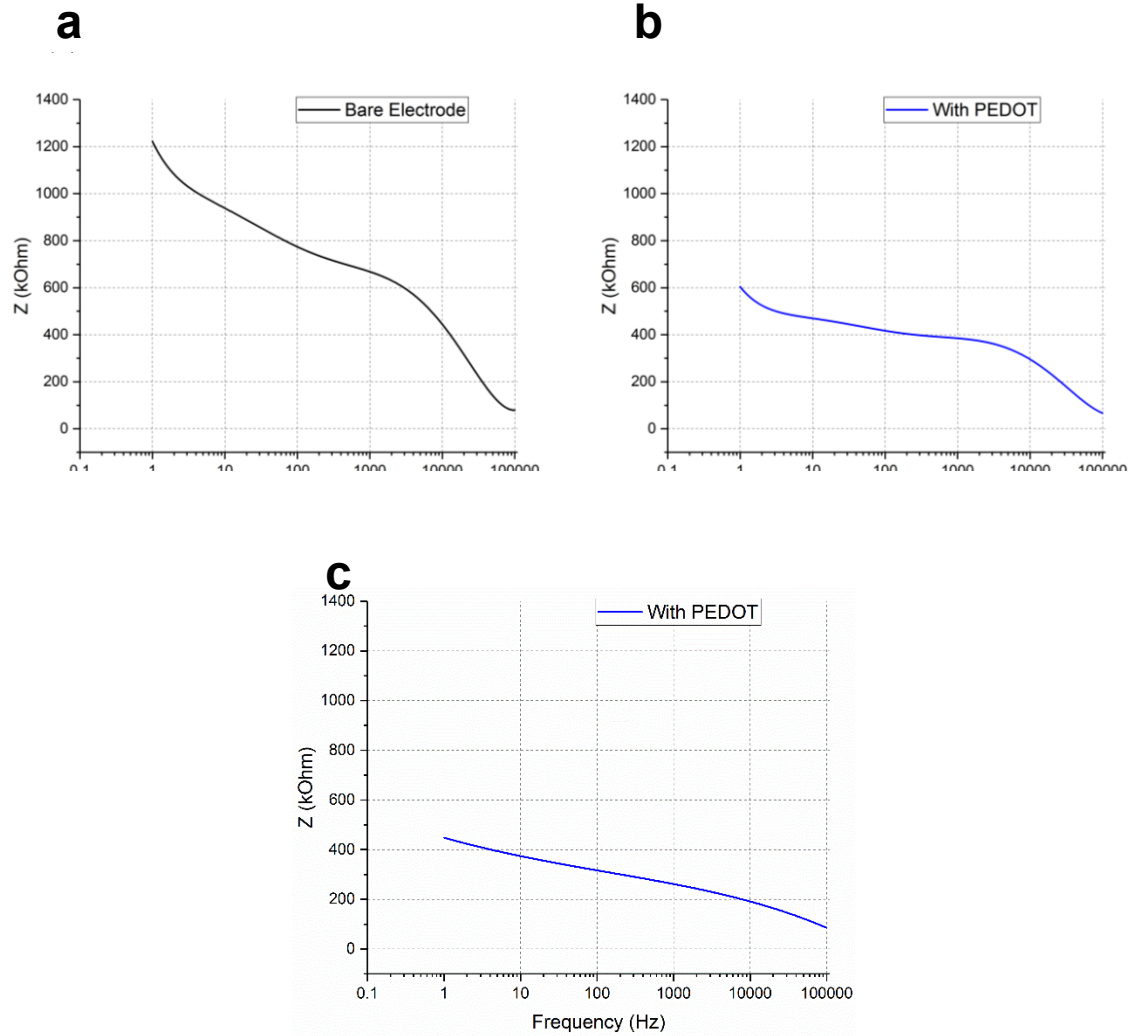

## Supplementary figure 4

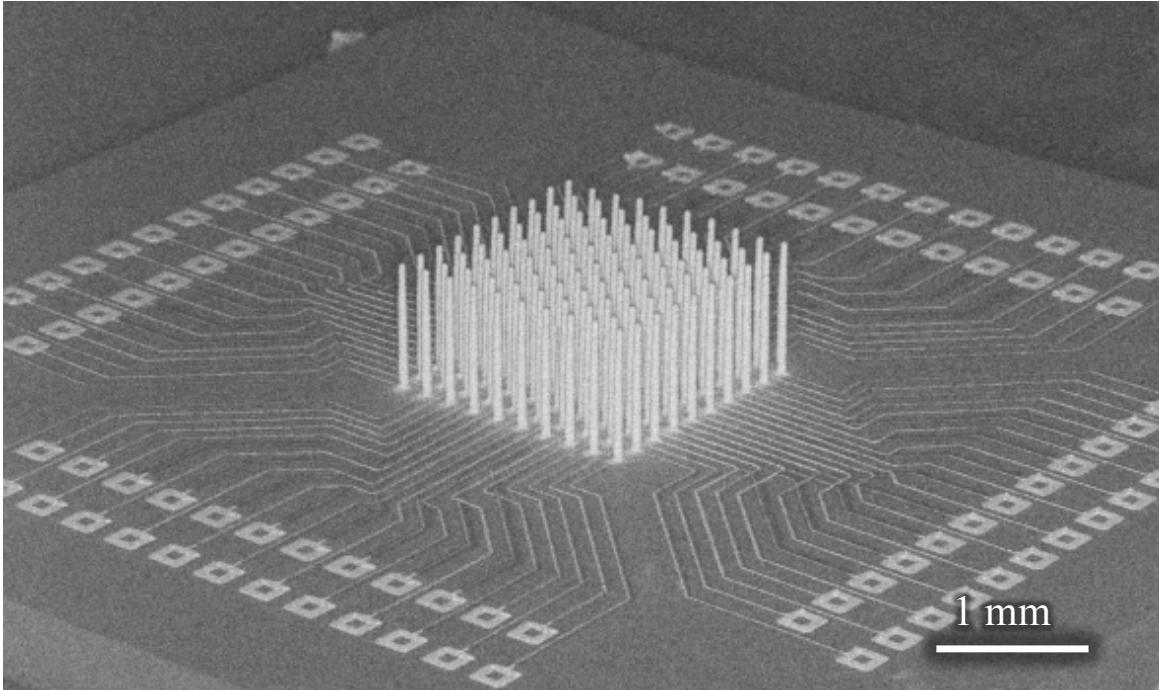

## Supplementary figure 5

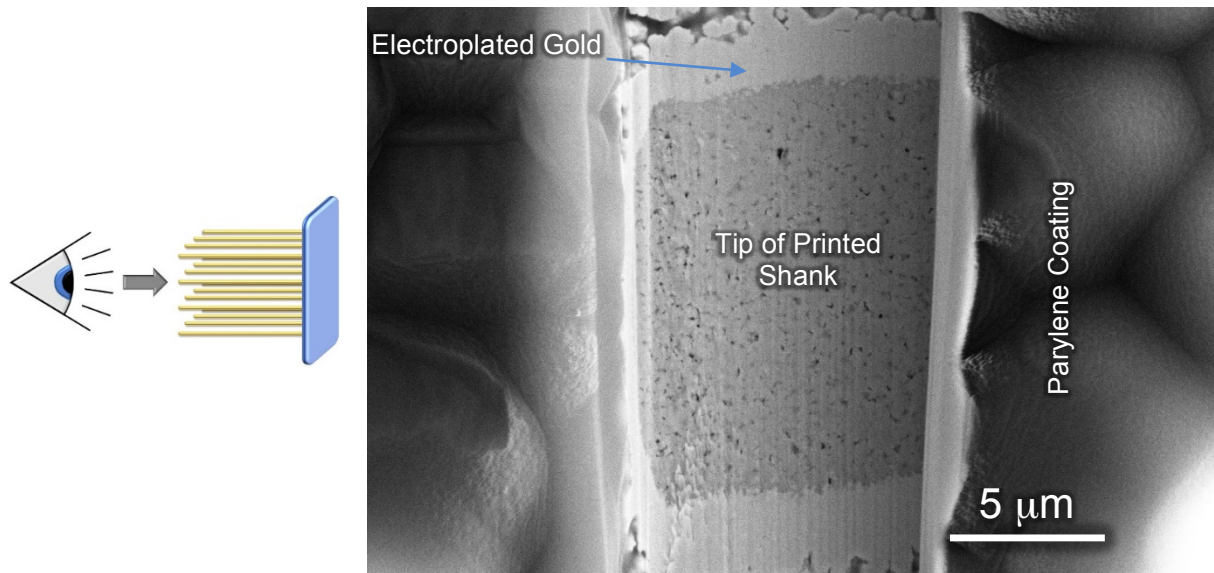

Source: https://www.biorxiv.org/content/10.1101/742346v1.full.pdf
